# Supplementary material
Source: PubMed Central journal article supplement (PMC4191054)

Supplemental material for Neutrophils from a Patient with Papillon-Lefèvre Syndrome.

#### Supplemental Table 1

Differentially expressed azurophil granule proteins from a normal control (Ctl) versus patient samples (PLS). In total 1422 proteins including proteins flagged as contaminants and decoys were identified from the  $\alpha$ ,  $\beta_1$ ,  $\beta_2$  and  $\gamma$  fractions by GeLC-MSMS. The list was subsequently filtered for the most interesting proteins by the following criteria: i) Must be present in the  $\alpha$ -fraction, ii) Intensity must comprise  $>0.1\%$  of total intensity, iii) Must peak in the a-fraction or at least have 75% of the intensity of the b1-fraction if peaking here (to account for the small contamination of the a-fraction in the  $\beta_1$ -fraction). Listed are proteins that are at least 50% increase in Ctl relative to the PLS samples: Protein intensities for individual proteins were calculated as the sum of the peptide intensities for all peptides matched to the listed proteins. The number show the ratio of the protein intensities in the Ctl and PLS  $\alpha$ -fractions for the listed protein. (4): Protein intensities for individual proteins were calculated as the sum of the peptide intensities for all peptides matched to the listed proteins. The number shows in % how much each protein in the Ctl  $\alpha$ -fraction comprises of the summed intensities of all proteins in the Ctl  $\alpha$ -fraction.

#### Supplemental Figure 1:

Subcellular fractionation of control and PLS neutrophils. Neutrophils ( $1.7 \times 10^8$ ) from a healthy control (Ctl) and the PLS patient ( $1.7 \times 10^8$ ) were cavitated and separated on a 3-layer Percoll density gradient. Fractions of 1 mL each were collected from the bottom of the gradients and assayed for marker proteins for each major granule subsets: MPO (azurophil granules), NGAL (specific granules), Gelatinase (gelatinase granules), Albumin (secretory vesicles), and HLA (Plasma membranes). The distribution is given in 1A. For each marker the value is given relative to its maximal value. These were as follows: MPO Ctl: 21.5  $\mu\text{g/mL}$ , PLS: 31.9

µg/mL; NGAL Ctl: 2.8 µg/mL, PLS: 2.7 µg/mL; Gelatinase: Ctl: 8.7 µg/mL, PLS: 9.2 µg/mL; Alb Ctl: 2,6 µg/mL, PLS: 1.7 µg/mL; HLA Ctl: 175 arb.U/mL, PLS: 136 arb.U/mL.

Samples with peak activity were collected and pooled as follows: α-band (MPO-peak): fractions #1-8; β1-band (NGAL peak): #9-15; β2-band (gelatinase peak): #16-20. γ-band (Alb and HLA): #21-28. Percoll was removed by centrifugation and the biological material was resuspended in 200 µL PBS. The distribution of marker proteins in these fractions which were named α (azurophil granules), β1 (specific granules), β2 (gelatinase granules), and γ (Light membranes including secretory vesicles and plasma membranes), were determined by elisa and expressed relative to the amount present in control, which were as follows: MPO: 268 µg/mL; NGAL: 26 µg/mL; Gelatinase: 19.5 µg/mL; Alb: 25 µg/mL; HLA: 2033 arb U/mL.

Supplemental Figure 2.

Quantitative real time PCR.

Bone marrow cells from a normal control and the PLS patient were separated on Lymphoprep and depleted of non-myeloid cells by MACS as described in Methods. Cells from the interphase which contain the neutrophil precursors up to meta-myelocytes were subjected to quantitative real time PCR as described in Methods. The mRNA for Myeloperoxidase (MPO), Neutrophil Elastase (ELANE), Cathepsin G (CTSG), Proteinase 3 (PRTN3) and Cathepsin C (CTSC), and NGAL (LCN2) was determined. Actin was run as an internal standard.

Supplemental table 1

Differentially expressed azurophil granule proteins in normal samples (Ctl) versus patient samples (PLS)

| Protein IDs | Gene Name   | Protein name                                     | Ratio(Ctl/PLS) | Fraction (in %) of the total protein intensity from the $\alpha$ -fraction |
|-------------|-------------|--------------------------------------------------|----------------|----------------------------------------------------------------------------|
| IPI00328415 | CYB5R3      | NADH-cytochrome b5 reductase 3                   | 138.6          | 0.27                                                                       |
| IPI00028064 | CTSG        | Cathepsin G                                      | 40.1           | 10.21                                                                      |
| IPI00409684 | NCKAP1      | Nck-associated protein 1                         | 26.0           | 0.45                                                                       |
| IPI00013163 | MNDA        | Myeloid cell nuclear differentiation antigen (5) | 16.2           | 0.12                                                                       |
| IPI00016339 | RAB5C; RABL | Ras-related protein Rab-5C                       | 12.4           | 0.28                                                                       |
| IPI00027769 | ELA2; ELANE | Neutrophil elastase                              | 9.71           | 1.87                                                                       |
| IPI00019345 | RAP1A       | Ras-related protein Rap-1A                       | 9.26           | 0.61                                                                       |
| IPI00645452 | TUBB        | Tubulin beta-7 chain                             | 7.02           | 0.27                                                                       |
| IPI00006690 | EPER; EPO   | Eosinophil peroxidase                            | 6.90           | 14.40                                                                      |
| IPI00005778 | PRG3        | Proteoglycan 3                                   | 5.89           | 2.04                                                                       |
| IPI00019449 | RNASE2      | Non-secretory ribonuclease                       | 5.72           | 1.46                                                                       |
| IPI00027409 | MBN; PRTN3  | Proteinase 3,                                    | 5.26           | 1.68                                                                       |
| IPI00010133 | CORO1A      | Coronin-1A; 40 kDa protein                       | 4.97           | 0.24                                                                       |
| IPI00022246 | AZU1        | Azurocidin                                       | 4.83           | 5.94                                                                       |
| IPI00010341 | MBP; PRG2   | Bone marrow proteoglycan                         | 4.68           | 3.24                                                                       |
| IPI00219825 | PSAP        | Prosaposin                                       | 1.74           | 0.14                                                                       |
| IPI00019038 | LYZ         | Lysozyme                                         | 1.73           | 5.09                                                                       |
| IPI00023728 | GGH         | Gamma-glutamyl hydrolase                         | 1.64           | 0.15                                                                       |
| IPI00025427 | ECP         | Eosinophil cationic protein                      | 1.56           | 3.97                                                                       |

## Subcellular fractionation of control and PLS neutrophils

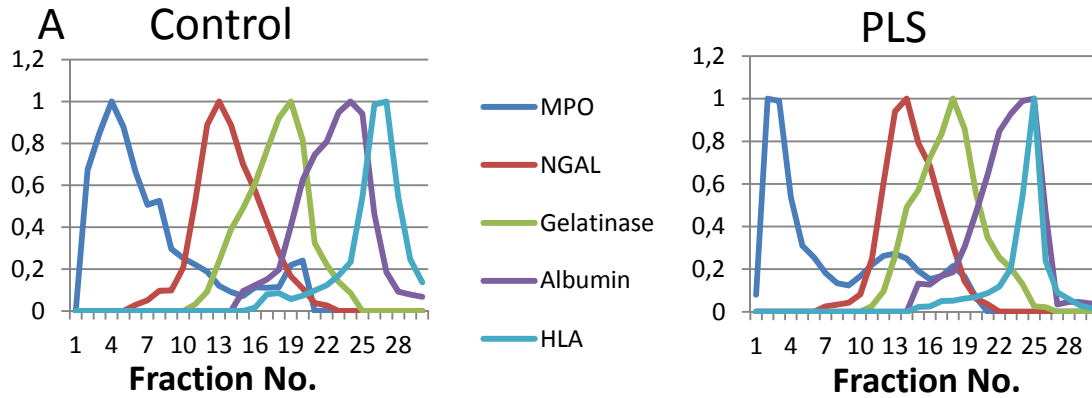

## B Characterization of fractions used for proteome analysis and Western blotting

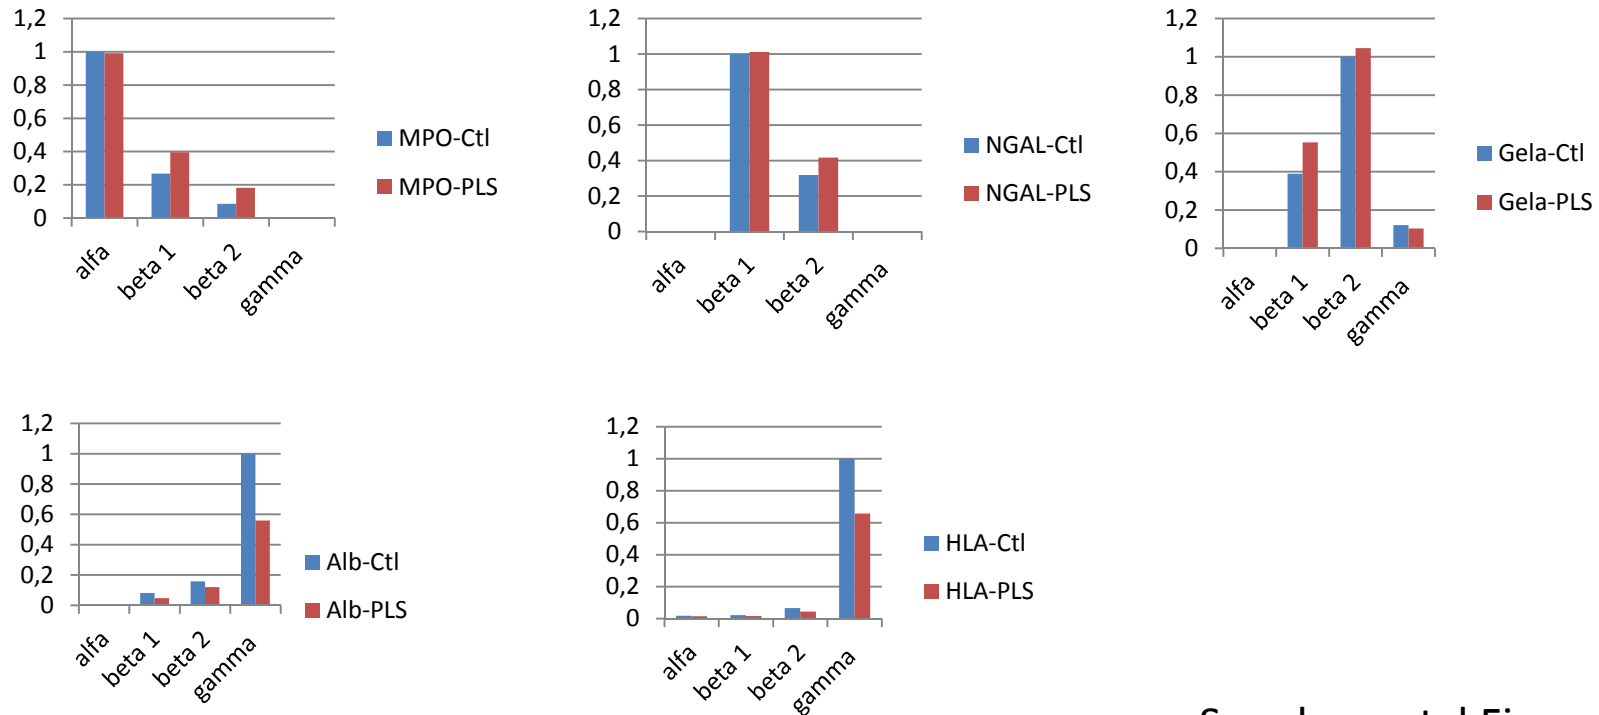

Supplemental Figure 1

# Supplemental Figure 2

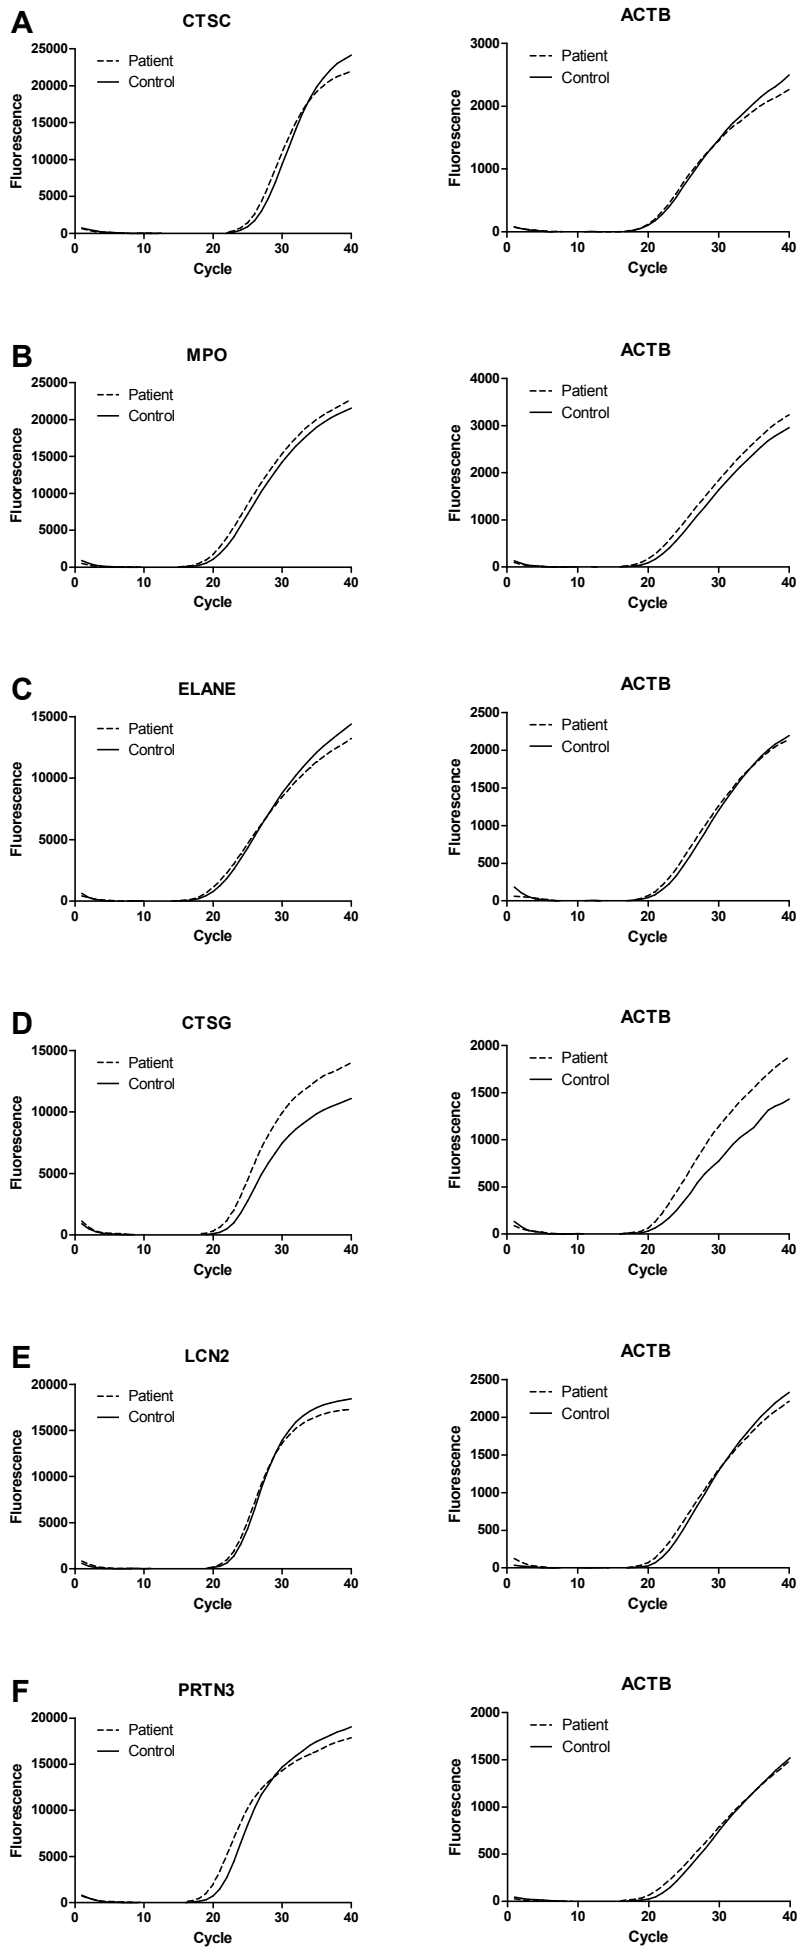

Supplement: JCI76009sd.pdf [file JCI76009sd.pdf]
